# Supplementary material for: Understanding the role of surface oxygen-containing functional groups on carbon-supported cobalt catalysts for the oxygen evolution reaction
Source: Royal Society of Chemistry journal article supplement (doi:10.1039/d3ta04077a), 2023-01-01
Supplement: d3ta04077a1.pdf [file d3ta04077a1.pdf]

**1 Understanding the role of surface oxygen-containing functional groups**  
**2 on carbon-supported cobalt catalysts for oxygen evolution reaction**

3 Thi Ha My Pham,<sup>a,b</sup> Youngdon Ko,<sup>a,b</sup> Manhui Wei,<sup>a,b,c</sup> Kangning Zhao,<sup>d</sup> Liping Zhong,<sup>a,b,\*</sup> Andreas Züttel<sup>a,b</sup>

4

5 <sup>a</sup>Laboratory of Materials for Renewable Energy (LMER), Institute of Chemical Sciences and Engineering  
6 (ISIC), Basic Science Faculty (SB), Ecole Polytechnique Fédérale de Lausanne (EPFL) Valais/Wallis,  
7 Energypolis, Rue de l'Industrie 17, CH-1951 Sion, Switzerland

8 <sup>b</sup>EMPA Materials & Technology, CH-8600 Dübendorf, Switzerland

9 <sup>c</sup>School of Mechanical Engineering, Beijing Institute of Technology, Beijing 100081, P. R. China

10 <sup>d</sup>Laboratory of Advanced Separations, Ecole Polytechnique Federale de Lausanne, Sion, Switzerland

11

12

13 E-mail: [liping.zhong@epfl.ch](mailto:liping.zhong@epfl.ch)

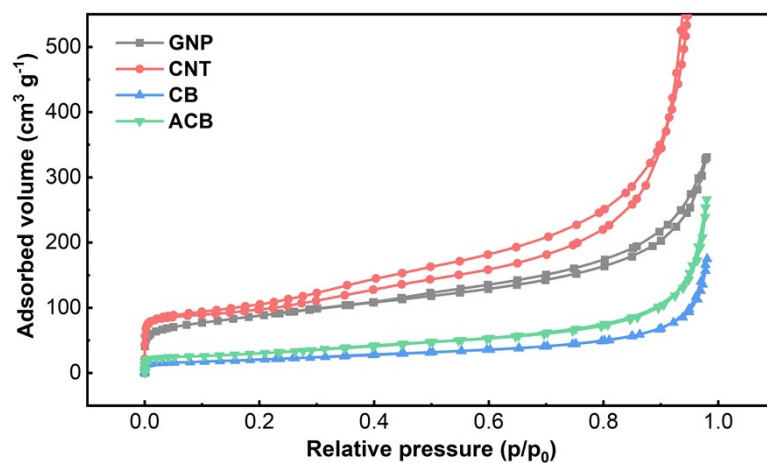

15

16 Figure S1 N<sub>2</sub> adsorption-desorption as a function of relative pressure, acquired by N<sub>2</sub>-adsorption measurements on  
 17 the four fresh supports.

18

19 Table S1 Summary of the BET surface area of the four fresh supports, derived from the N<sub>2</sub> adsorption-desorption  
20 measurements using BET method.

| Support | BET surface area (m <sup>2</sup> g <sup>-1</sup> ) |
|---------|----------------------------------------------------|
| CNT     | 368                                                |
| ACB     | 107                                                |
| CB      | 74                                                 |
| GNP     | 310                                                |

21

22

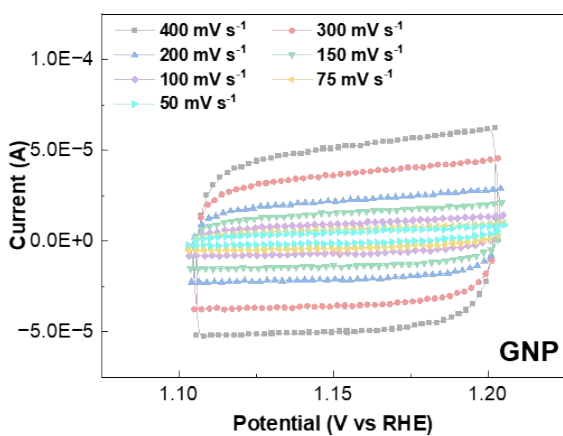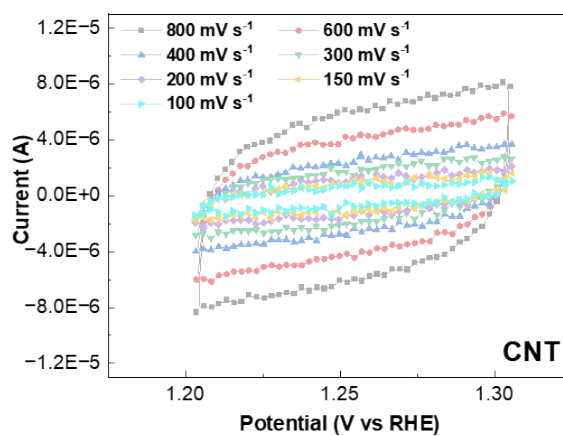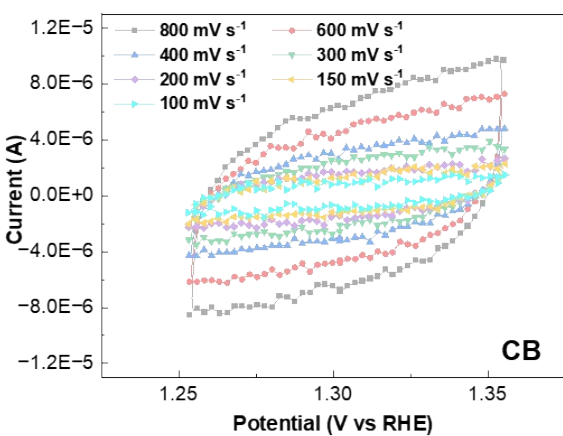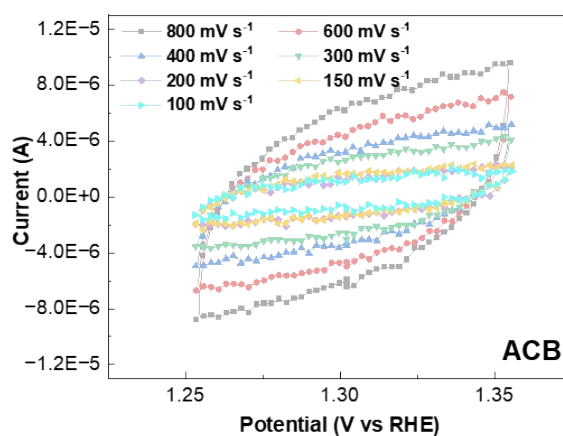

23

24 Figure S2 Double-layer capacitance measurements for different carbon supports. The sub-figures plot the current as  
 25 a function different scan rate.

26

27

28

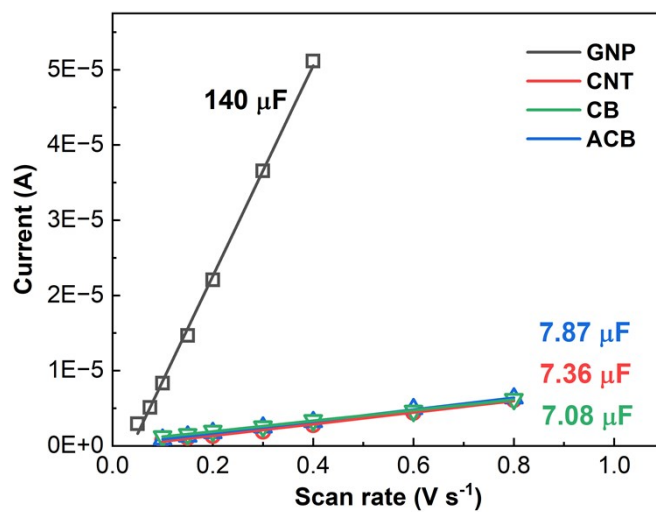

29

30 Figure S3 Linear regression of the measured charging currents as a function of the scan rate. The slope of the line  
 31 corresponds to the double-layer capacitance.

32

33

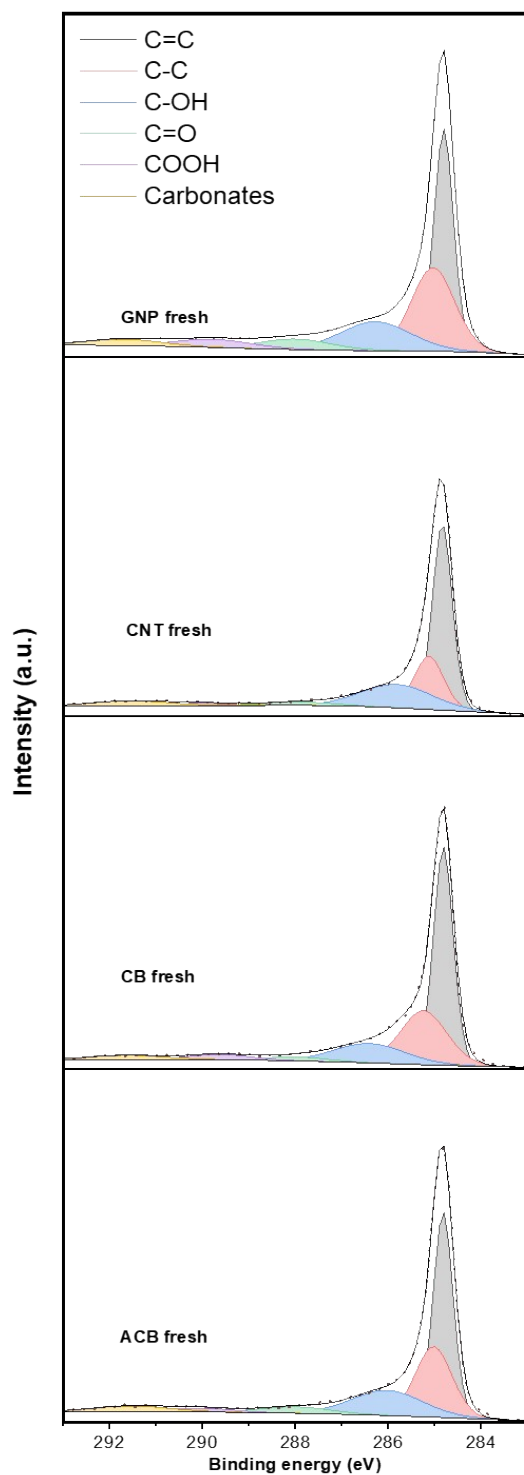

34

35 Figure S4 XPS C 1s spectra of the four supports, and the fitted peaks for carbon (C=C and C-C), surface oxygen  
 36 containing groups (COH, COOH and C=O), and surface carbon oxygenates

37

38

39 Table S2 Summary of the surface concentration of oxygen and s-OFGs, measured on the four fresh supports.

|     | Oxygen (%) | COH (%) | COOH (%) | C=O (%) |
|-----|------------|---------|----------|---------|
| GNP | 3.32       | 1.48    | 0.32     | 1.37    |
| CB  | 3.51       | 1.32    | 0.32     | 1.72    |
| ACB | 1.15       | 0.38    | 0.21     | 0.49    |
| CNT | 0.65       | 0.12    | 0.23     | 0.31    |

41 Table S3 Co contents in the synthesized catalysts: GNP-0.5, CNT-0.5, CB-0.5 and ACB-0.5, averaged from 2 sets of  
42 measurements

| Co concentration (%) |                 |
|----------------------|-----------------|
| GNP                  | $0.51 \pm 0.01$ |
| CNT                  | $0.57 \pm 0.23$ |
| CB                   | $0.46 \pm 0.23$ |
| ACB                  | $0.53 \pm 0.10$ |

43

44

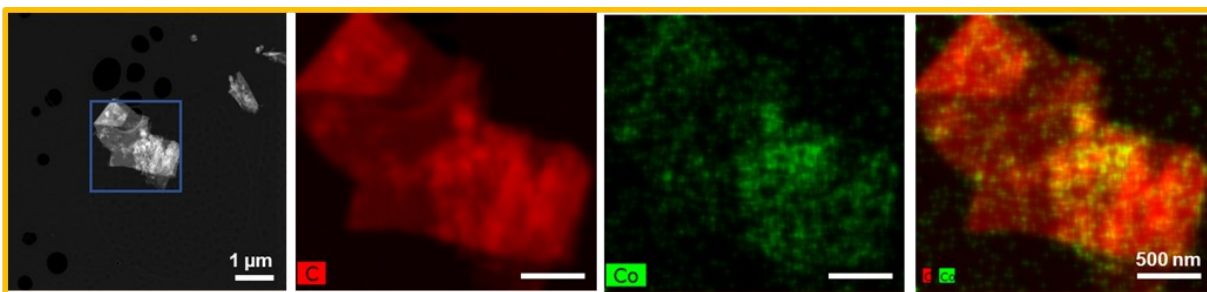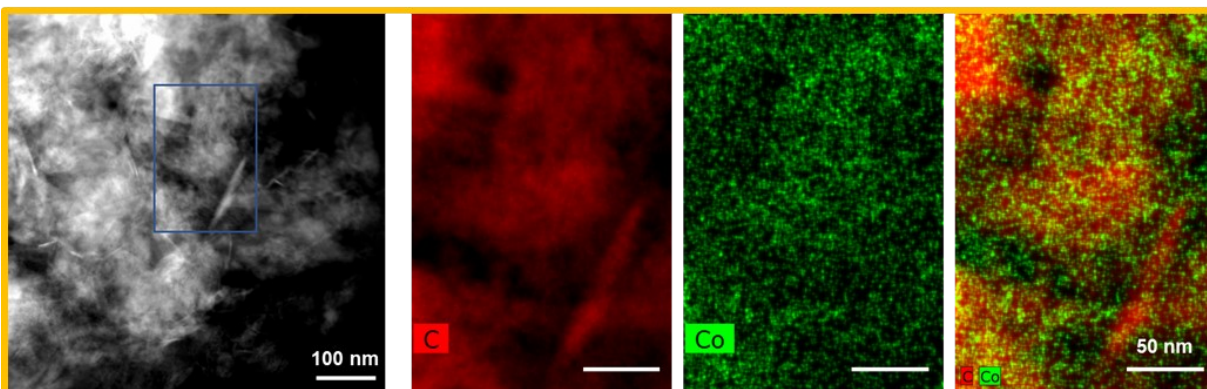

45

46 Figure S5 HAADF-STEM images and the corresponding elemental maps for C and Co, obtained at two different regions

47 on GNP-0.5.

48

49

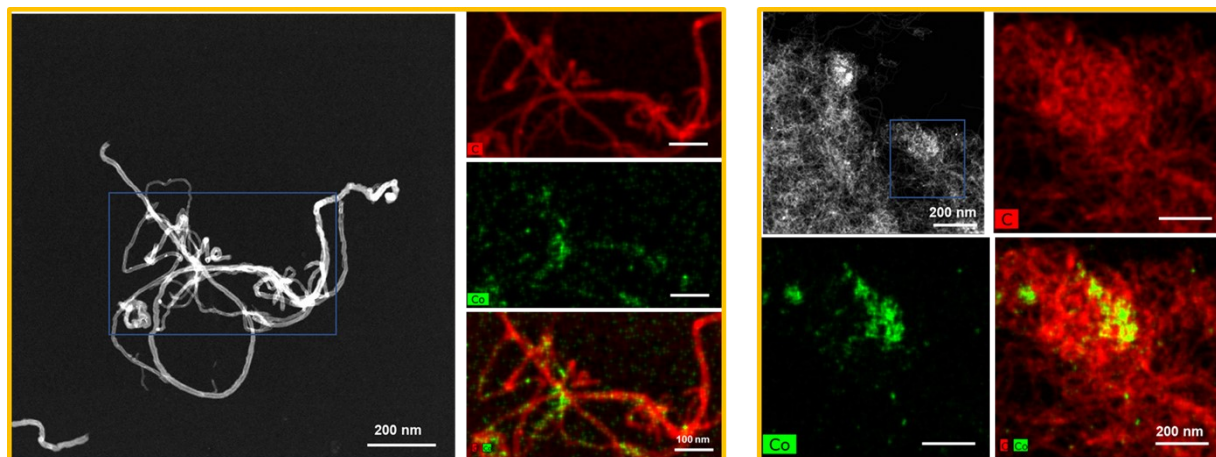

50  
 51 Figure S6 HAADF-STEM images and the corresponding elemental maps for C and Co, obtained at two different regions  
 52 on CNT-0.5.

53

54

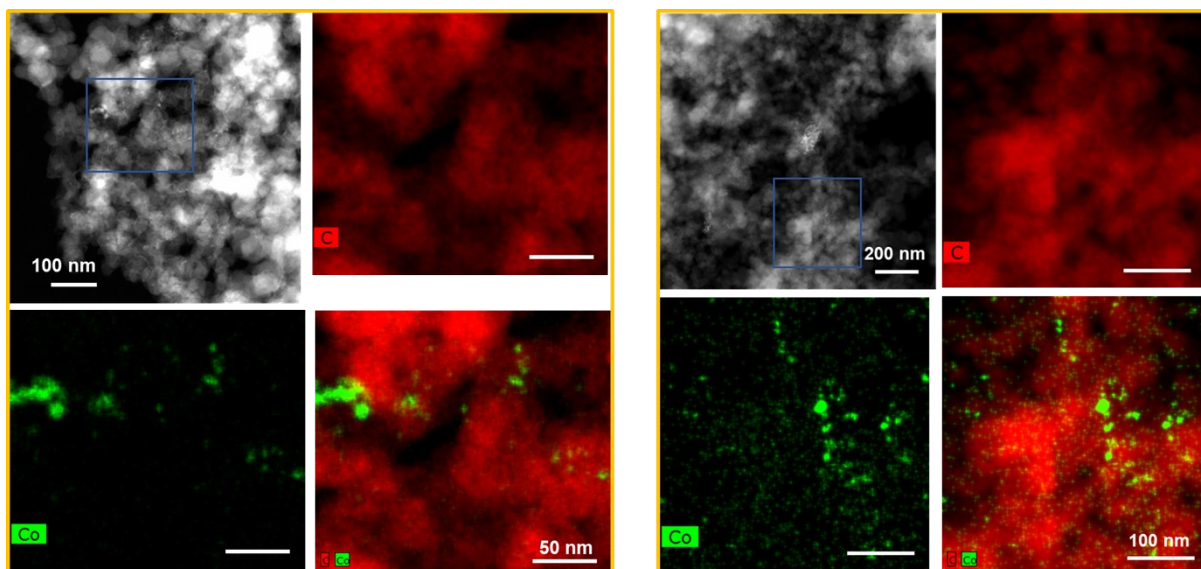

55

56 Figure S7 HAADF-STEM images and the corresponding elemental maps for C and Co, obtained at two different regions  
 57 on CB-0.5.

58

59

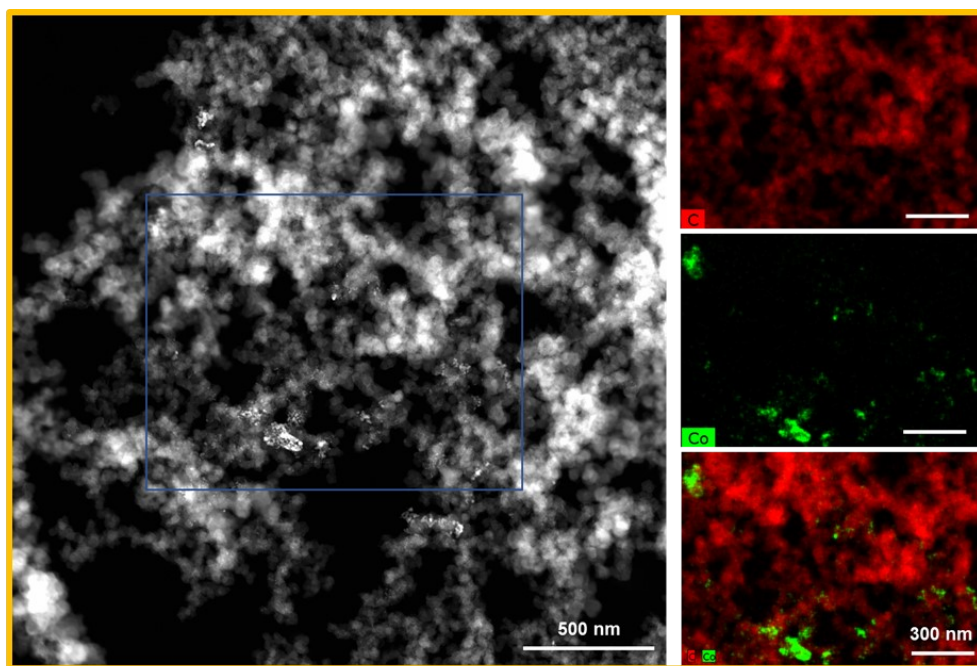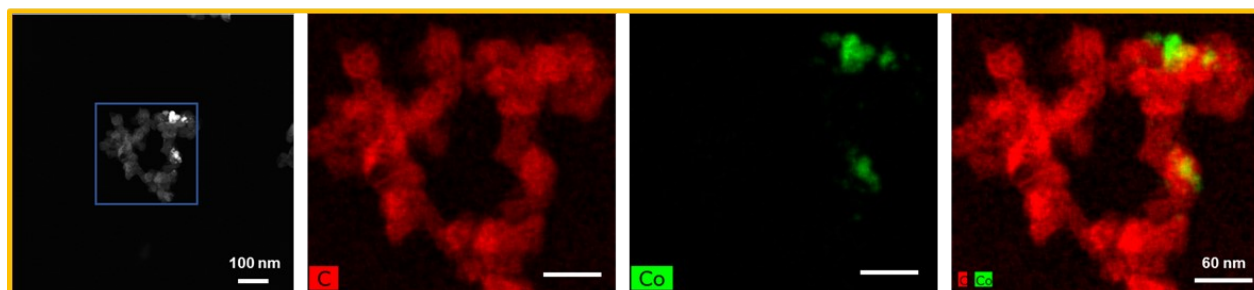

60  
 61 Figure S8 HAADF-STEM images and the corresponding elemental maps for C and Co, obtained at two different regions  
 62 on ACB-0.5.  
 63

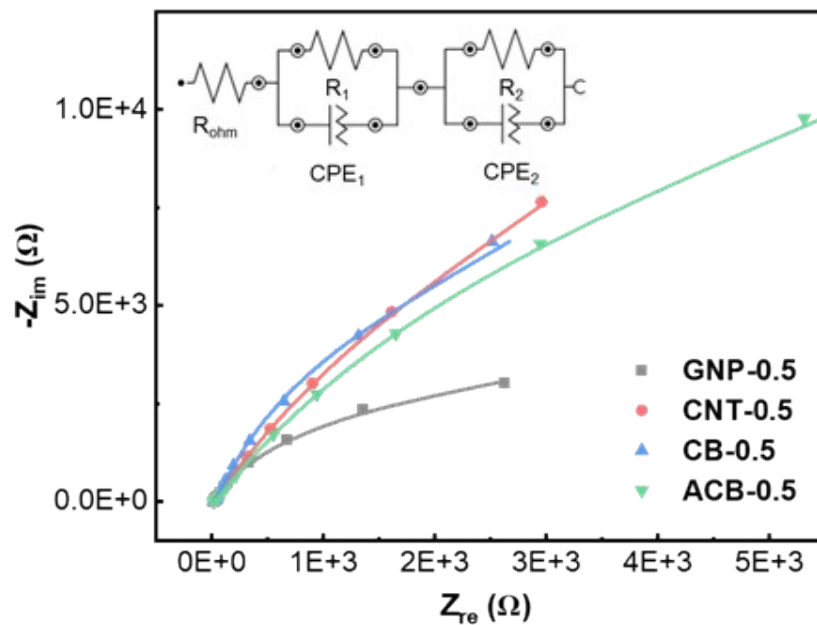

65

66 Figure S9 Nyquist plot and the fitted curve according to the corresponding equivalent circuit. The EIS was acquired  
 67 at 1.5 V vs RHE, with a perturbation amplitude of  $\pm 10$  mV, from 100 kHz to 0.1 Hz.

68

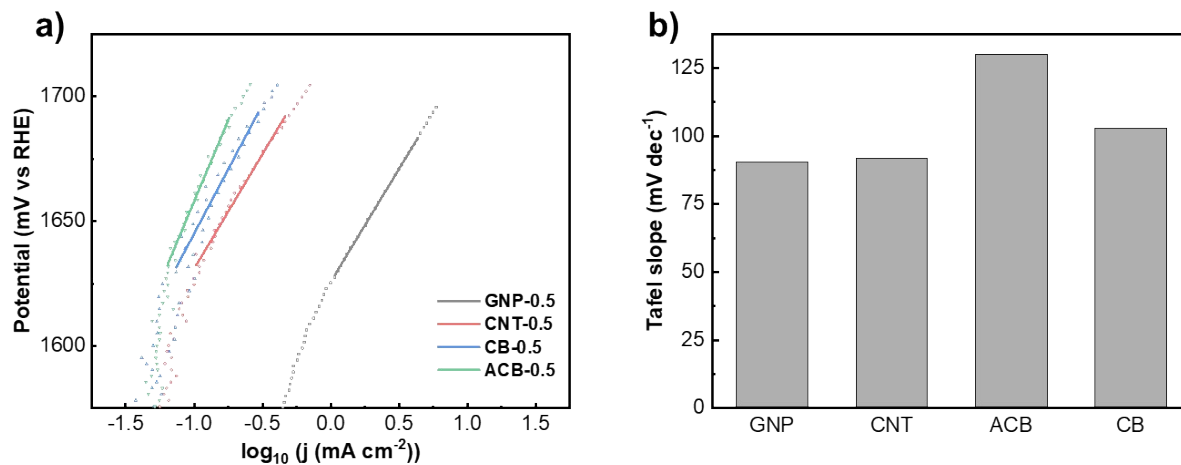

69

70 Figure S10 a) Tafel plots and b) the corresponding Tafel slopes of Co- catalyst supported on four different carbons.

71

72 Table S4 Mass activities of previously reported Co-based catalysts.

| References               | Samples                                              | Overpotential<br>(V vs RHE) | Mass activity ( $A\ g^{-1}$ ) |
|--------------------------|------------------------------------------------------|-----------------------------|-------------------------------|
| <b>A</b> <sup>[1]</sup>  | Co SAC                                               | 1.65                        | 2209                          |
| <b>B</b> <sup>[2]</sup>  | BN/CA-NiCoFe-600                                     | 1.6                         | 201                           |
| <b>C</b> <sup>[3]</sup>  | Co <sub>0.7</sub> Fe <sub>0.3</sub> CB               | 1.55                        | 643                           |
| <b>D</b> <sup>[4]</sup>  | Ir-networks (Ir:Co = 1:55)                           | 1.53                        | 800                           |
| <b>E</b> <sup>[5]</sup>  | SL-Co(OH) <sub>2</sub>                               | 1.58                        | 153.8                         |
| <b>F</b> <sup>[6]</sup>  | Au-Co(OH) <sub>2</sub>                               | 1.5                         | 177                           |
| <b>G</b> <sup>[7]</sup>  | $\gamma$ -CoOOH nanosheets                           | 1.53                        | 66.6                          |
| <b>H</b> <sup>[8]</sup>  | YRCo-560                                             | 1.48                        | 49.75                         |
| <b>I</b> <sup>[9]</sup>  | EtOH-CoO                                             | 1.7                         | 2900                          |
| <b>J</b> <sup>[10]</sup> | ECA-Co <sub>x</sub> Ni <sub>1-x</sub> S <sub>2</sub> | 1.57                        | 217                           |

73

74

75

76

77

78 Table S5 Summary of  $I_d/I_g$  ratio of the fresh- and doped- carbon, determined with Raman spectroscopy. The presented  
 79 value was obtained from at least 10 different regions.

| Support | Fresh           | With Co doping  |
|---------|-----------------|-----------------|
| GNP     | $0.11 \pm 0.02$ | $0.15 \pm 0.06$ |
| CNT     | $0.76 \pm 0.11$ | $0.79 \pm 0.09$ |
| CB      | $1.11 \pm 0.04$ | $1.22 \pm 0.04$ |
| ACB     | $1.12 \pm 0.03$ | $1.20 \pm 0.04$ |

80

81

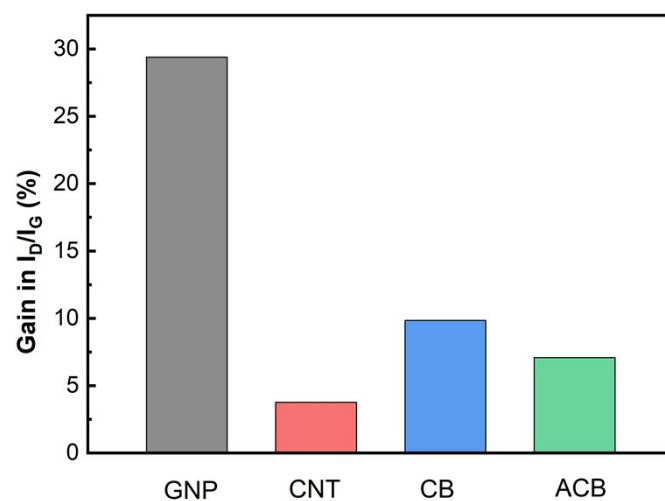

83

84 Figure S11 The gain in  $I_d/I_g$  between before and after Co-incorporation. This value is calculated as the quotient  
 85 between  $[I_d/I_{g[\text{Co-doped}]} - I_d/I_{g[\text{fresh support}]}]$  and  $[I_d/I_{g[\text{fresh support}]}]$ .

86

87

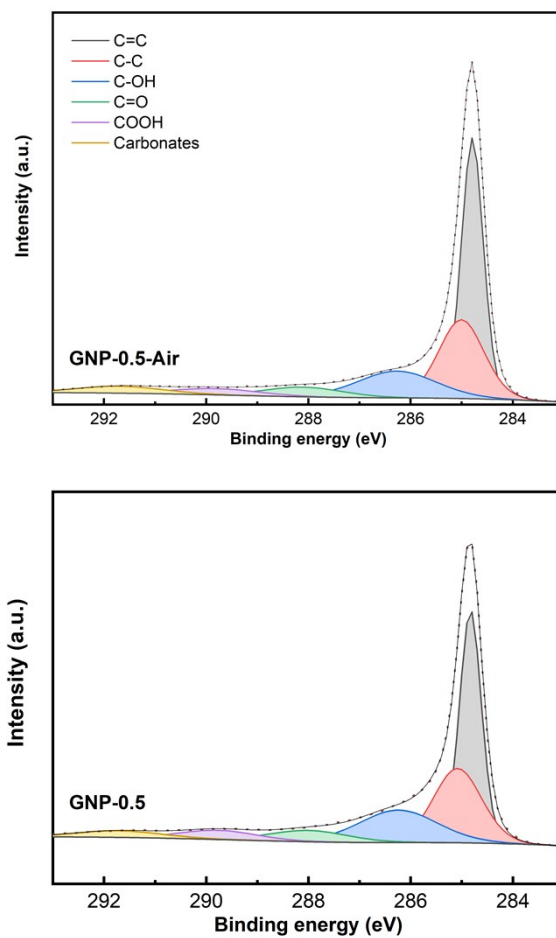

88

89 Figure S12 XPS C 1s spectra of GNP-0.5-Air and GNP-0.5 and the corresponding deconvoluted peaks.

90

91 Table S6 Summary of the s-OFGs surface concentration on the fresh GNP support, GNP-0.5-Air and GNP-0.5. The s-  
 92 OFGs surface concentration is the ratio [area of s-OFGs fitted in O 1s spectra] to [total area of carbon in C 1s spectra].

|                                | GNP support | GNP-0.5-Air | GNP-0.5 |
|--------------------------------|-------------|-------------|---------|
| Oxygen surface contents (%)    | 3.21        | 3.47        | 4.37    |
| C=O surface concentration (%)  | 1.37        | 1.53        | 1.00    |
| COH surface concentration (%)  | 1.48        | 1.49        | 1.96    |
| COOH surface concentration (%) | 0.32        | 0.27        | 1.15    |

93

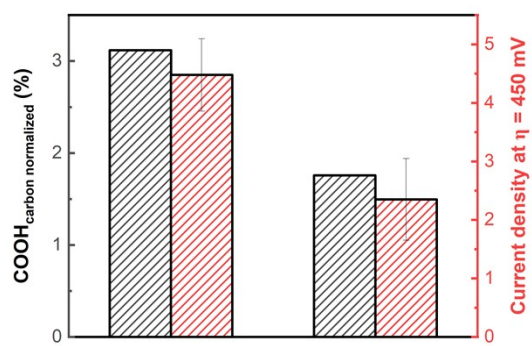

95

96 Figure S13 Specific COOH surface concentration and geometric current density at an overpotential of 450 mV of GNP-  
97 0.5-Air and GNP-0.5.

98

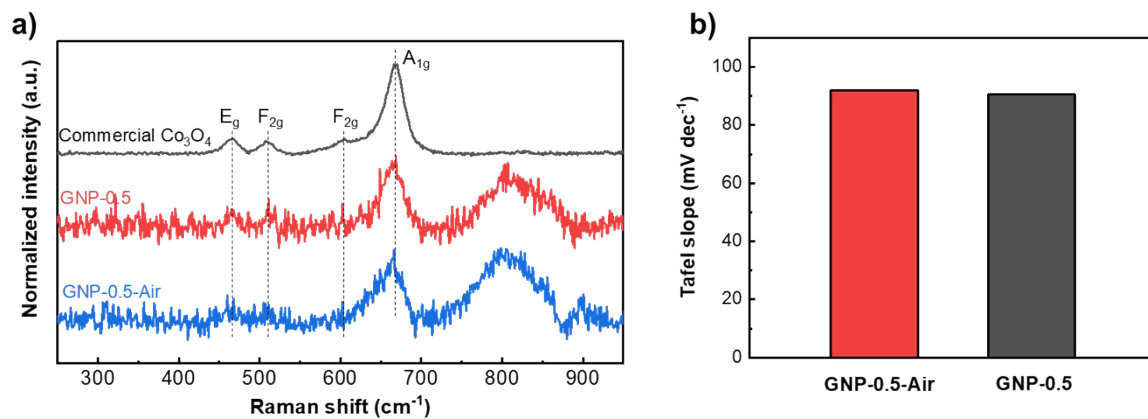

99

100 Figure S14 a) Raman spectroscopy including the peaks of  $\text{Co}_3\text{O}_4$ , acquired on GNP-0.5, GNP-0.5-Air and on commercial  
 101  $\text{Co}_3\text{O}_4$ . b) the Tafel slopes of GNP-0.5 and GNP-0.5-Air

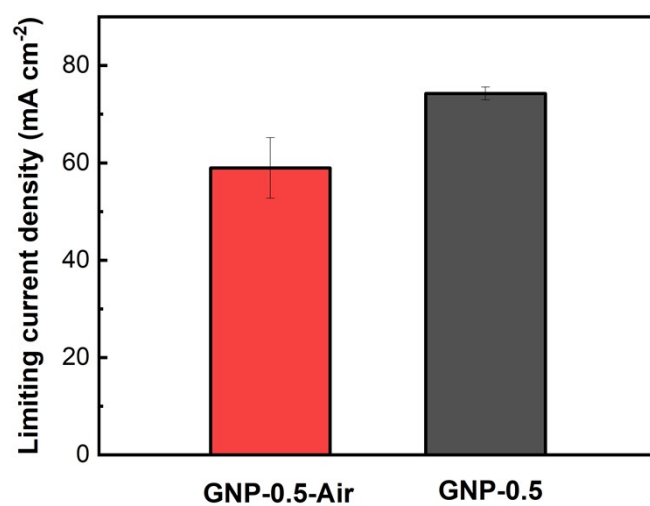

103

104 Figure S15 Summary of the limiting current density, calculated from LSV of GNP-0.5-Air and GNP-0.5, in Fe-free KOH

105 1M, scanned from 1.5 to 2.2 V vs RHE at a scan rate of 10 mV s<sup>-1</sup>. The potential was corrected with 85% of iR-drop.

106

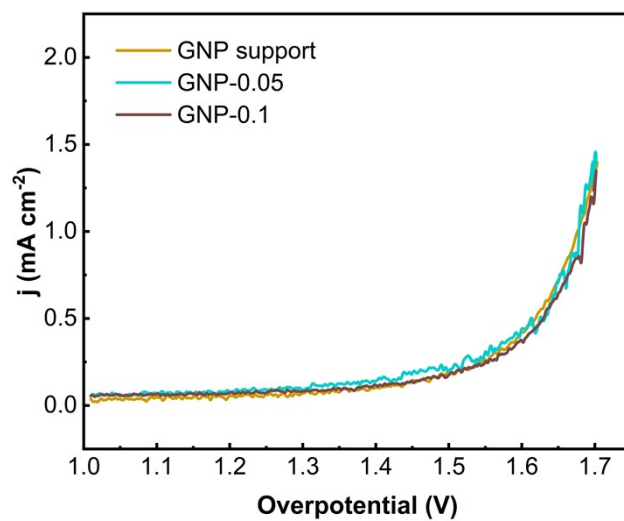

107

108 Figure S16 CVs of GNP, GNP-0.05 and GNP-0.1 loadings in Fe-free 1M KOH solution, scanned from 1.0–1.7 V vs RHE  
 109 at a scan rate of  $10 \text{ mV s}^{-1}$ . CV curves were iR-corrected (85% iR drop compensation) and averaged across the forward  
 110 and backward scans.

111

112 Table S7 Co contents in the synthesized catalysts with different Co loadings: GNP-0.5, GNP-4.8, GNP-9.1, GNP-17 and  
 113 GNP-29, averaged from 3 sets of measurements

| Theoretical loading | Co concentration by ICP-OES |
|---------------------|-----------------------------|
| <b>0.5</b>          | $0.51 \pm 0.01$             |
| <b>4.8</b>          | $4.67 \pm 0.71$             |
| <b>9.1</b>          | $10.88 \pm 0.21$            |
| <b>17</b>           | $17.72 \pm 4.33$            |
| <b>29</b>           | $29.62 \pm 6.81$            |

114

115

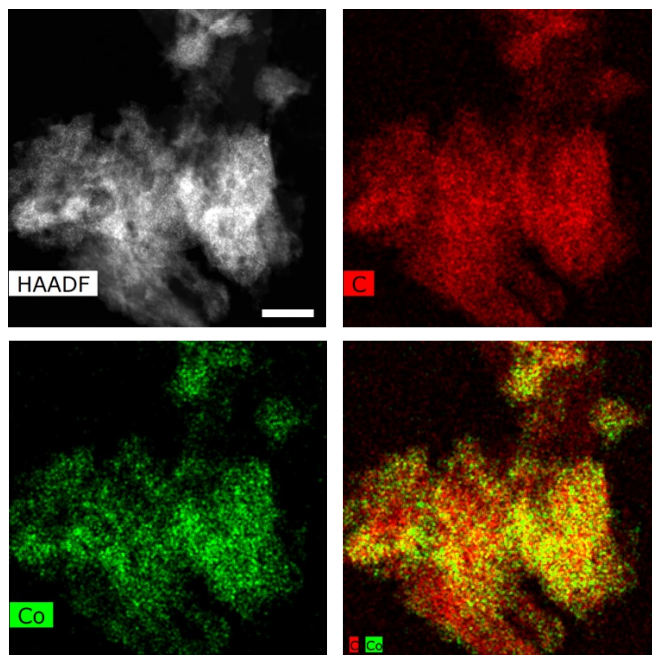

116

117 Figure S17 HAADF-STEM images and the corresponding elemental maps for C and Co of GNP-4.8. Scale bar: 100 nm.

118

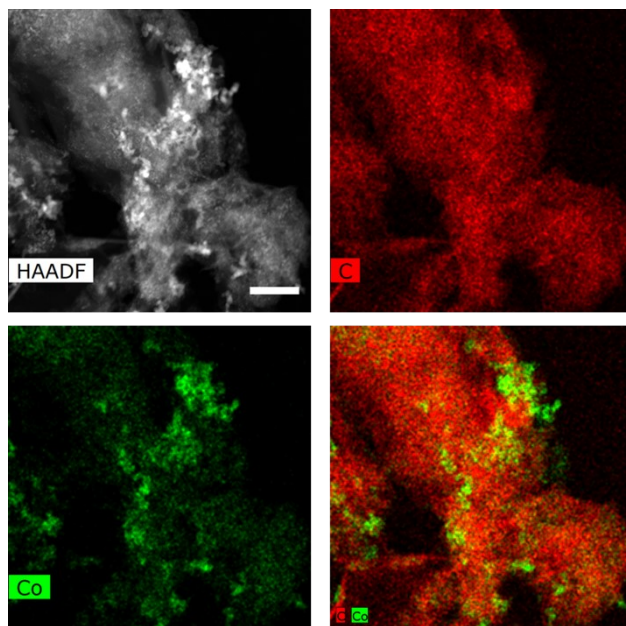

119

120 Figure S18 HAADF-STEM images and the corresponding elemental maps for C and Co of GNP-9.1. Scale bar: 100 nm.

121

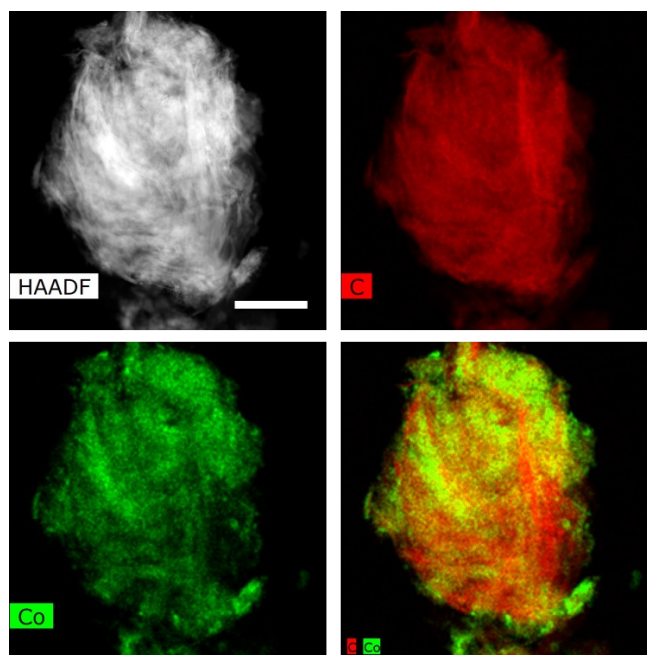

122

123 Figure S19 HAADF-STEM images and the corresponding elemental maps for C and Co of GNP-17. Scale bar: 1  $\mu\text{m}$ .

124

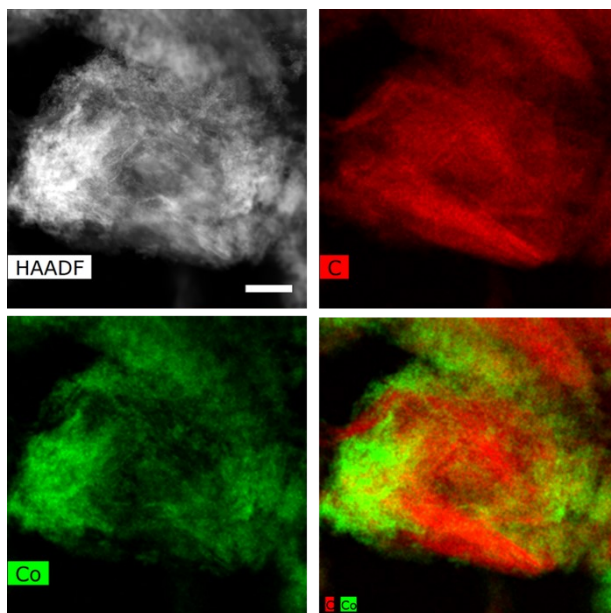

125

126 Figure S20 HAADF-STEM images and the corresponding elemental maps for C and Co of GNP-29. Scale bar: 200 nm.

127

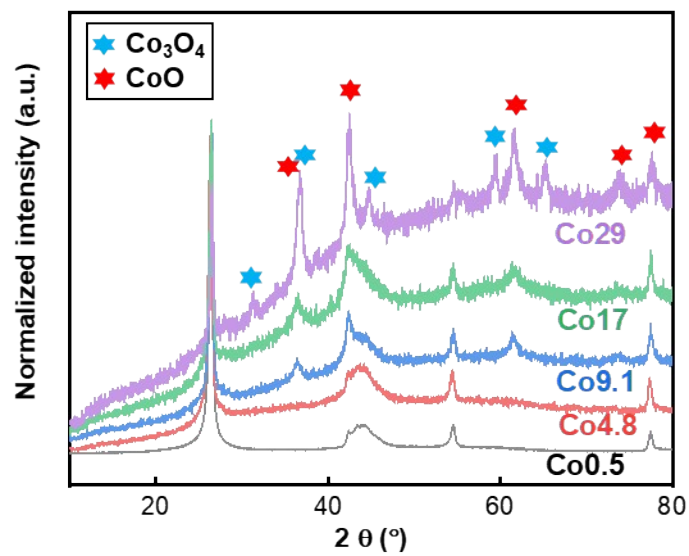

128

129 Figure S21 XRD patterns of the Co-based catalysts supported on GNP at different Co loadings and the reference bulk  
 130 oxide phases (CoO PDF 1541662, Co<sub>3</sub>O<sub>4</sub> PDF 1548531)

131

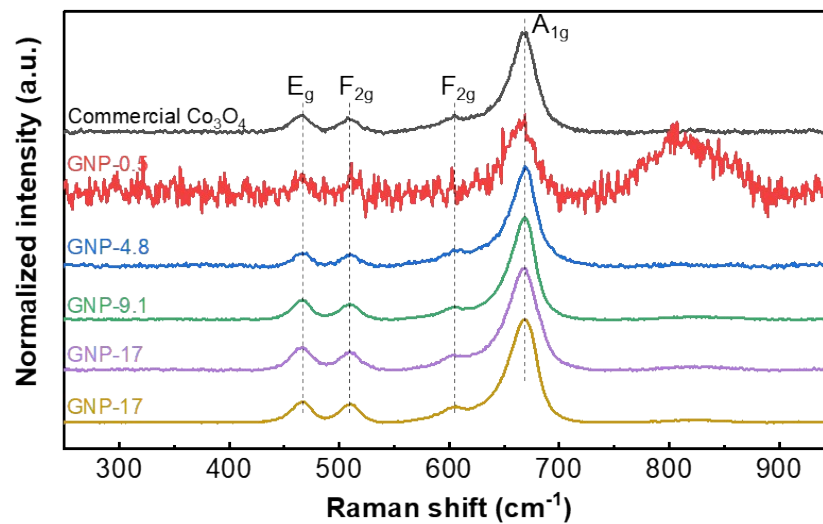

132

133 Figure S22 Raman spectroscopy including the peaks of  $\text{Co}_3\text{O}_4$ , acquired on Co-catalyst supported on GNP at various  
 134 Co loadings and on commercial  $\text{Co}_3\text{O}_4$ .

135

136 Table S8 Summary of  $I_d/I_g$  ratio of the Co-based catalysts supported on GNP at different Co loadings, determined with  
 137 Raman spectroscopy. The presented value was obtained from at least 10 different regions. The gain in  $I_d/I_g$  between  
 138 before and after Co-incorporation is calculated as the quotient between  $[I_d/I_{g[\text{Co-doped}]} - I_d/I_{g[\text{fresh GNP}]}]$  and  $[I_d/I_{g[\text{fresh GNP}]}]$ .

| Co loading | $I_d/I_g$         | Gain in $I_d/I_g$ (%) |
|------------|-------------------|-----------------------|
| 0          | $0.114 \pm 0.023$ |                       |
| 0.5        | $0.148 \pm 0.056$ | 29.410                |
| 4.8        | $0.154 \pm 0.085$ | 34.586                |
| 9.1        | $0.141 \pm 0.034$ | 23.434                |
| 17         | $0.140 \pm 0.023$ | 22.065                |
| 29         | $0.154 \pm 0.051$ | 34.250                |

139

140

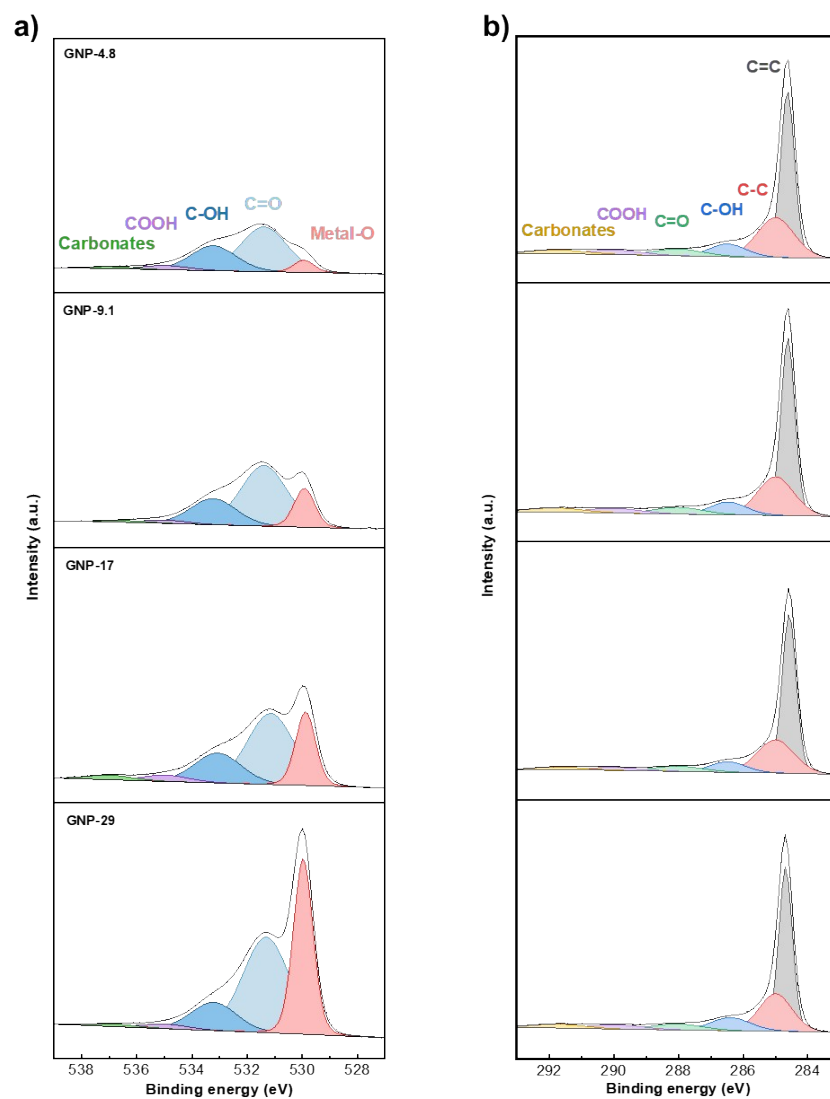

141

142 Figure S23 XPS spectra of different Co-catalyst supported on GNP, at various Co loadings. a) XPS O 1s spectra and b)

143 XPS C 1s spectra and the corresponding deconvoluted peaks.

144

145

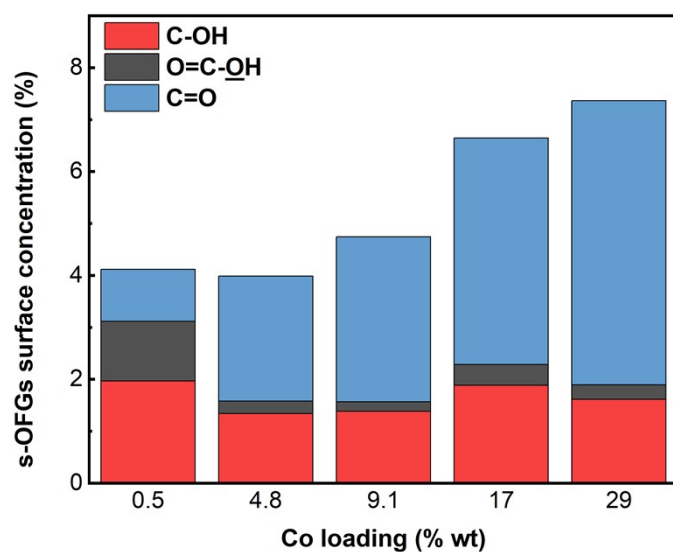

146

147 Figure S24 Surface concentration of COH, COOH and C=O, measured on Co-based catalysts supported on GNP at  
148 different Co loadings.

149

150

151 Table S9 Summary of the surface concentration of COH, COOH and C=O, measured on Co-based catalysts supported  
 152 on GNP at different Co loadings.

| Co loading (%) | C-OH | O=C-OH | C=O  |
|----------------|------|--------|------|
| 0.5            | 1.96 | 1.15   | 1.00 |
| 4.8            | 1.34 | 0.24   | 2.41 |
| 9.1            | 1.39 | 0.18   | 3.18 |
| 17             | 1.89 | 0.40   | 4.36 |
| 29             | 1.62 | 0.28   | 5.47 |

153

154

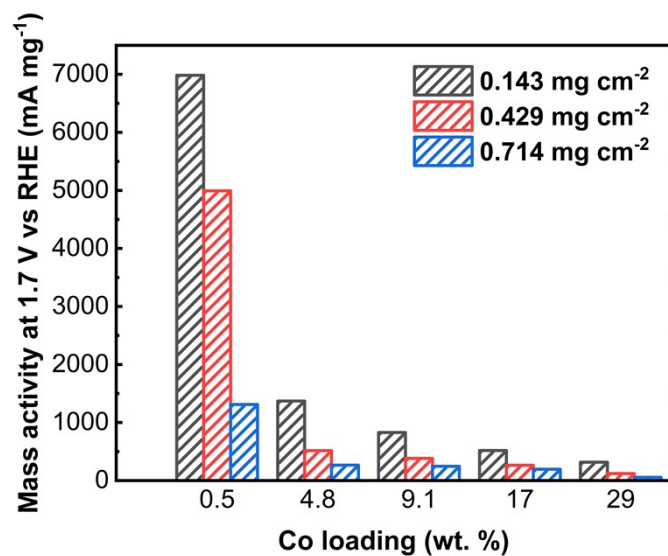

155

156 Figure S25 Summary of the mass activities at 1.7 V vs RHE of GNP-0.5, GNP-4.8, GNP-9.1, GNP-17 and GNP-29 in Fe-  
 157 free 1M KOH solution, at various surface loadings.

158

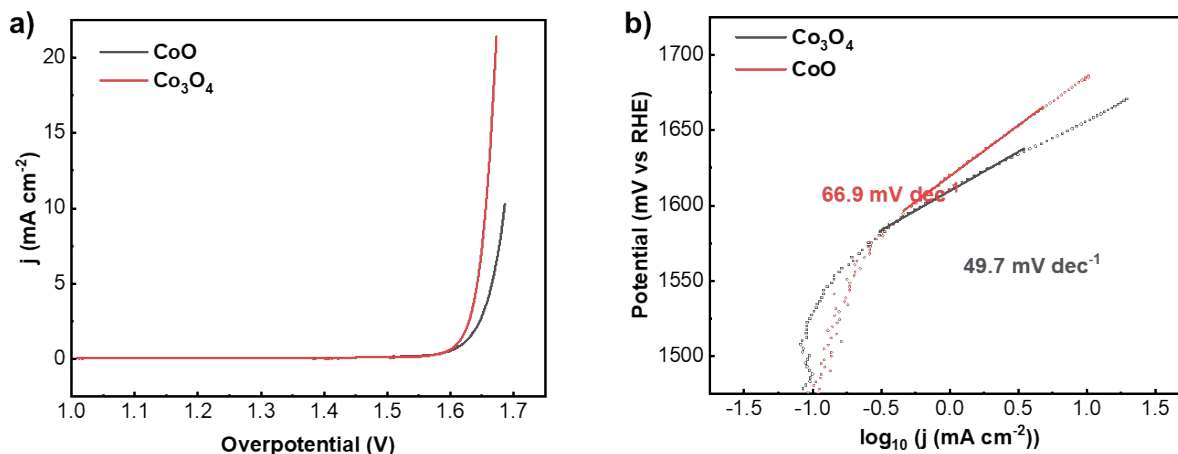

159

160 Figure S26 OER activity of commercial CoO and Co<sub>3</sub>O<sub>4</sub>. a) CV in Fe-free KOH 1M, scanned from 1.0 to 1.7 V vs RHE at  
 161 a scan rate of 10 mV s<sup>-1</sup>. The curves were corrected with 85% of iR-drop, and averaged from onward and backward  
 162 scans. b) The corresponding Tafel slopes.

163

164 Table S10 Summary of the surface concentration of COH, COOH and C=O, measured on Co-based catalysts supported  
 165 on GNP at different Co loadings, normalized by the Co mass loading of the samples.

| Co loading<br>(%) | Co-normalized C-<br>OH (%) | Co-normalized<br>O=C-OH (%) | Co-normalized<br>C=O (%) | Co-normalized<br>$I_d/I_g$ |
|-------------------|----------------------------|-----------------------------|--------------------------|----------------------------|
| 0.5               | 3.929                      | 2.305                       | 1.998                    | 0.296                      |
| 4.8               | 0.279                      | 0.050                       | 0.502                    | 0.032                      |
| 9.1               | 0.152                      | 0.020                       | 0.349                    | 0.016                      |
| 17                | 0.111                      | 0.023                       | 0.257                    | 0.008                      |
| 29                | 0.056                      | 0.010                       | 0.189                    | 0.005                      |

166

167

## 168 REFERENCES

- 169 [1] P. Kumar, K. Kannimuthu, A. S. Zeraati, S. Roy, X. Wang, X. Wang, S. Samanta, K. A. Miller, M. Molina,  
170 D. Trivedi, J. Abed, M. A. Campos Mata, H. Al-Mahayni, J. Baltrusaitis, G. Shimizu, Y. A. Wu, A.  
171 Seifitokaldani, E. H. Sargent, P. M. Ajayan, J. Hu, M. G. Kibria, *J. Am. Chem. Soc.* **2023**, *145*, 8052.
- 172 [2] R. Lu, D. K. Sam, W. Wang, S. Gong, J. Liu, A. Durairaj, M. Li, X. Lv, *J. Colloid Interface Sci.* **2022**, *613*,  
173 126.
- 174 [3] L. Yang, H. Liu, H. Shen, Y. Huang, S. Wang, L. Zheng, D. Cao, *Adv. Funct. Mater.* **2020**, *30*, 1.
- 175 [4] A. W. Jensen, G. W. Sievers, K. D. Jensen, J. Quinson, J. A. Arminio-Ravelo, V. Brüser, M. Arenz, M.  
176 Escudero-Escribano, *J. Mater. Chem. A* **2020**, *8*, 1066.
- 177 [5] P. Jash, P. Srivastava, A. Paul, *Chem. Commun.* **2019**, *55*, 2230.
- 178 [6] C. Cai, S. Han, X. Zhang, J. Yu, X. Xiang, J. Yang, L. Qiao, X. Zu, Y. Chen, S. Li, *RSC Adv.* **2022**, *12*, 6205.
- 179 [7] J. Huang, J. Chen, T. Yao, J. He, S. Jiang, Z. Sun, Q. Liu, W. Cheng, F. Hu, Y. Jiang, Z. Pan, S. Wei, *Angew.*  
180 *Chemie - Int. Ed.* **2015**, *54*, 8722.
- 181 [8] M. Kim, B. Lee, H. Ju, S. W. Lee, J. Kim, *Adv. Mater.* **2019**, *31*, 1.
- 182 [9] A. Bähr, H. Petersen, H. Tüysüz, *ChemCatChem* **2021**, *13*, 3824.
- 183 [10] Y. R. Hong, S. Mhin, K. M. Kim, W. S. Han, H. Choi, G. Ali, K. Y. Chung, H. J. Lee, S. I. Moon, S. Dutta, S.  
184 Sun, Y. G. Jung, T. Song, H. S. Han, *J. Mater. Chem. A* **2019**, *7*, 3592.

185
